# Supplementary material for: Detection and Genetic Diversity of Porcine Coronavirus Involved in Diarrhea Outbreaks in Spain
Source: Front Vet Sci. 2021 Feb 25;8:651999. doi: 10.3389/fvets.2021.651999 (PMC7947225; doi:10.3389/fvets.2021.651999)
Supplement: Supplementary Data 1 — Comparison of S1 amino acid sequences of PEDV isolates from this study with those of reference strains (GenBank accession nos. AF353511, KJ399978, and KY019623). Amino acid sequence variations in three major epitope regions (aa 220-233, aa 770-776, and aa 784-792) in the S1 genes of 41 Spanish PEDV strains. [file Data_Sheet_1.XLSX]

## Sheet: PEDV S1
							aa220 to aa233		aa770 to aa776		aa784 to aa792
				INDEL 1	PEDV_Belgium_1977_(AF353511)		CAMQYVYTPTYYML		SNIGVCK		PSQYGQVKI
				INDEL 2	PEDV_USA_2014_(KJ399978)		CAMQYVYTPTYYML		SNIGVCK		PSQSGQVKI
				INDEL 2	PEDV_Slovenia_2015_(KY019623)		CAMQYVYTPTYYML		SNIGVCK		PSQSGQVKI
				INDEL 2.1	PEDV_SP-VC55_Spain_2018_(MW251355)		CAMQYVYTPTYYML		SNIGVCK		PSQSGQVKI
				INDEL 2.1	PEDV_SP-VC87_Spain_2019_(MW251363)		CAMQYVYTPTYYML		SNIGVCK		PSQFGQVKI
				INDEL 2.2	PEDV_SP-VC27_Spain_2017_(MW251348)		CAMQYVYTPTYYML		SNIGVCK		PSQSGQVKI
				INDEL 2.2	PEDV_SP-VC29_Spain_2017_(MW251349)		CAMQYVYTPTYYML		SNIGVCK		PSQSGQVKI
				INDEL 2.2	PEDV_SP-VC51_Spain_2018_(MN692788)		CAMQYVYTPTYYML		SNIGVCK		PSQSGQVKI
				INDEL 2.2	PEDV_SP-VC52_Spain_2018_(MW251351)		CAMQYVYTPTYYML		SNIGVCK		PSQSGQVKI
				INDEL 2.2	PEDV_SP-VC77_Spain_2018_(MW251361)		CAMQYVYTPTYYML		SNIGVCK		PSQSGQVKI
				INDEL 2.2	PEDV_SP-VC81_Spain_2018_(MW251362)		CAMQYVYTPTYYML		SNIGVCK		PSQSGQVKI
				INDEL 2.2	PEDV_SP-VC89_Spain_2019_(MW251367)		FAMQYVYTPTYYML		SNIGVCK		PSQSGQVKI
				INDEL 2.2	PEDV_SP-VC90_Spain_2019_(MW251368)		CAMQYVYTPTYYML		SNIGVCK		PSQSGQVKI
				INDEL 2.2	PEDV_SP-VC92_Spain_2019_(MW251369)		CAMQYVYTPTYYML		SNIGVCK		PSQSGQVKI
				INDEL 2.2	PEDV_SP-VC94_Spain_2019_(MW251371)		CAMQYVYTPTYYML		SNIGVCK		PSQSGQVKI
				INDEL 2.2	PEDV_SP-VC97_Spain_2019_(MW251374)		CAMQYVYTPTYYML		SNIGVCK		PSQSGQVKI
				INDEL 2.2	PEDV_SP-VC96_Spain_2019_(MW251373)		CAMQYVYTPTYYML		SNIGVCK		PSQSGQVKI
				INDEL 2.2	PEDV_SP-VC98_Spain_2019_(MW251375)		CAMQYVYTPTYYML		SNIGVCK		PSQSGQVKI
				INDEL 2.2	PEDV_SP-VC99_Spain_2019_(MW251376)		CAMQYVYTPTYYML		SNIGVCK		PSQSGQVKI
				INDEL 2.2	PEDV_SP-VC100_Spain_2019_(MN692791)		CAMQYVYTPTYYML		SNICVCK		PSQSGQVKI
				INDEL 2.2	PEDV_SP-VC101_Spain_2019_(MW251377)		CAMQYVYTPTYYML		SNIGVCK		PSQSGQVKI
				INDEL 2.3	PEDV_SP-VC2_Spain_2017_(MN692784)		CAMQYVYTPTYYML		SNIGVCK		PSQSGQVKI
				INDEL 2.3	PEDV_SP-VC3_Spain_2017_(MW251343)		CAMQYVYTPTYYML		SNIGVCK		PSQSGQVKI
				INDEL 2.3	PEDV_SP-VC4_Spain_2017_(MW251344)		CAMQYVYTPTYYML		SNIGVCK		PSQSGQVKI
				INDEL 2.3	PEDV_SP-VC16_Spain_2017_(MW251345)		CAMQYVYTPTYYML		SNIGVCK		PSQSGQVKI
				INDEL 2.3	PEDV_SP-VC19_Spain_2017_(MW251347)		CAMQYVYTPTYYML		SNIGVCK		PSQSGQVKI
				INDEL 2.3	PEDV_SP-VC18_Spain_2017_(MW251346)		CAMQYVYTPTYYML		SNIGVCK		PSQSGQVKI
				INDEL 2.3	PEDV_SP-VC46_Spain_2018_(MW251350)		CAMQYVYTPTYYML		SNIGVCK		PSQSGQVKI
				INDEL 2.3	PEDV_SP-VC53_Spain_2018_(MW251352)		CAMQYVYTPTYYML		SNIGVCK		PSQSGQVKI
				INDEL 2.3	PEDV_SP-VC54_Spain_2018_(MW251354)		CAMQYVYTPTYYML		SNIGVCK		PSQSGQVKI
				INDEL 2.3	PEDV_SP-VC57_Spain_2018_(MN692789)		CAMQYVYTPTYYML		SNIGVCK		PSQSGQVKI
				INDEL 2.3	PEDV_SP-VC61_Spain_2018_(MW251356)		CAMQYVYTPTYYML		SNIGVCK		PSQSGQVKI
				INDEL 2.3	PEDV_SP-VC62_Spain_2018_(MN692790)		CAMQYVYTPTYYML		SNIGVCK		PSQSGQVKI
				INDEL 2.3	PEDV_SP-VC63_Spain_2018_(MW251357)		CAMQYVYTPTYYML		SNIGVCK		PSQSGQVKI
				INDEL 2.3	PEDV_SP-VC66_Spain_2018_(MW251358)		CAMQYVYTPTYYML		SNIGVCK		PSQSGQVKI
				INDEL 2.3	PEDV_SP-VC68_Spain_2018_(MW251359)		CAMQYVYTPTYYML		SNIGVCK		LSQSGQVKI
				INDEL 2.3	PEDV_SP-VC75_Spain_2018_(MW251360)		CAMQYVYTPTYYML		SNIGVCK		PSQSGQVKI
				INDEL 2.3	PEDV_SP-VC93_Spain_2019_(MW251370)		CAMQYVYTPTYYML		SNIGVCK		PSQSGQVKI
				INDEL 2.3	PEDV_SP-VC95_Spain_2019_(MW251372)		CAMQYVYTPTYYML		SNIGVCK		PSQSGQVKI
				INDEL 2.3	PEDV_POR-VC102_Portugal_2019_(MW251378)		CAMQYVYTPTYYML		SNIGVCK		PSQSGQVKI
				INDEL 2.3	PEDV_SP-VT13_Spain_2018_(MW251353)		CAMQYVYTPTYYML		SNIGVCK		PSQSGQVKI
				INDEL 2.3	PEDV_SP-VT86_Spain_2018_(MW251364)		CAMQYVYTPTYYML		SNIGVCK		PSQSGQVKI
				INDEL 2.3	PEDV_SP-VT87_Spain_2019_(MW251365)		CAMQYVYTPTYYML		SNIGVCK		PSQSGQVKI
				INDEL 2.3	PEDV_SP-VT108_Spain_2019_(MW251366)		CAMQYVYTPTYYML		SNIGVCK		PSQSGQVKI
